# Supplementary material
Source: MDPI journal article supplement (https://www.mdpi.com/2673-8112/3/9/87)
Supplement: s1 [file s1]

## Supplementary Material.

Educational experiences of children during COVID-19 at T1.

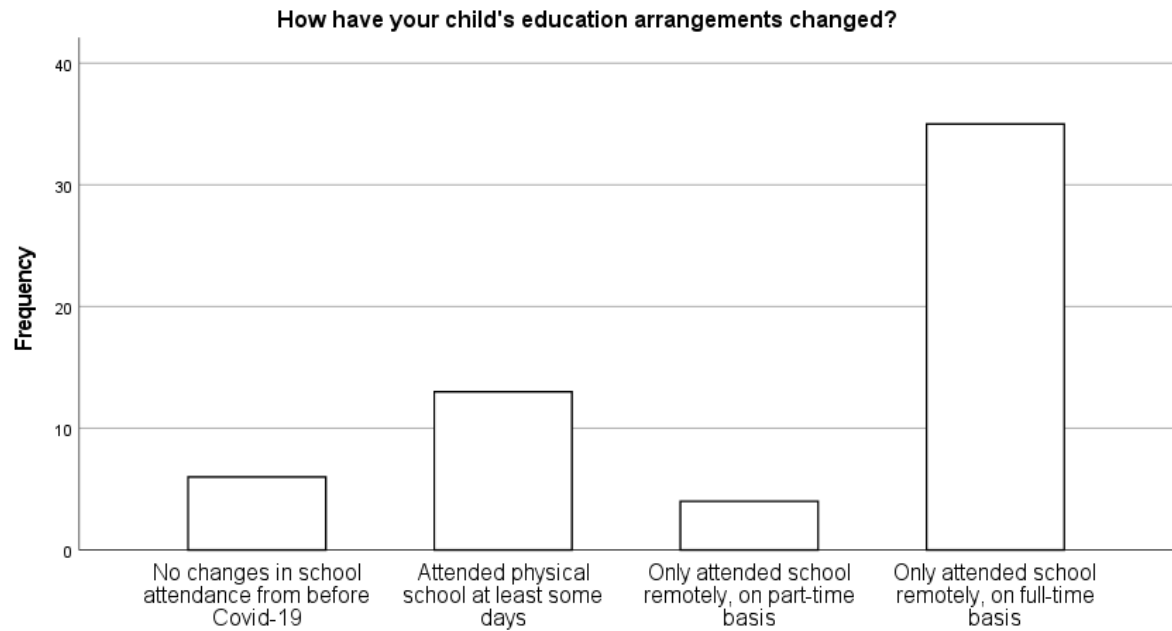

**Figure S1.** Changes in educational arrangements

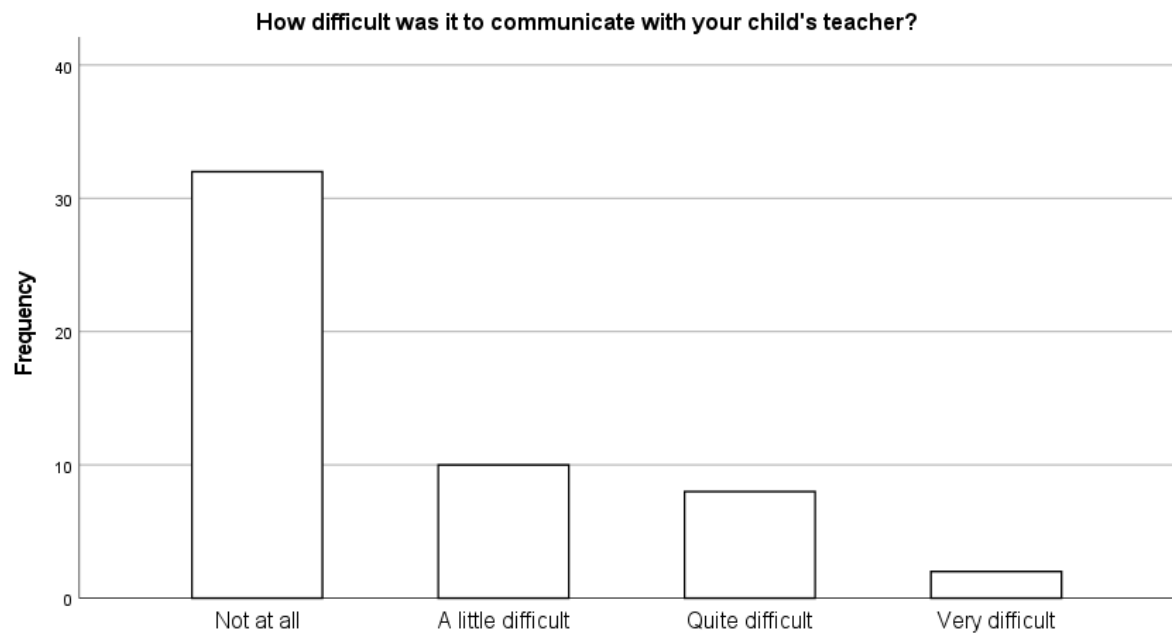

**Figure S2.** Difficulty in communicating with teacher

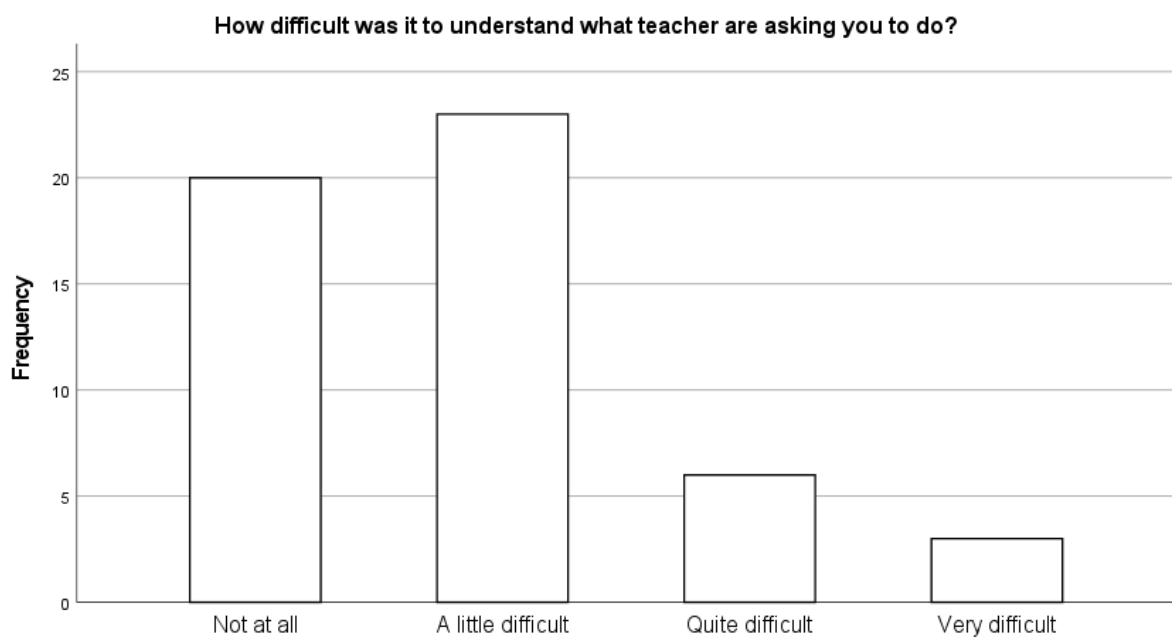

**Figure S3.** Difficulty in understanding task requirements

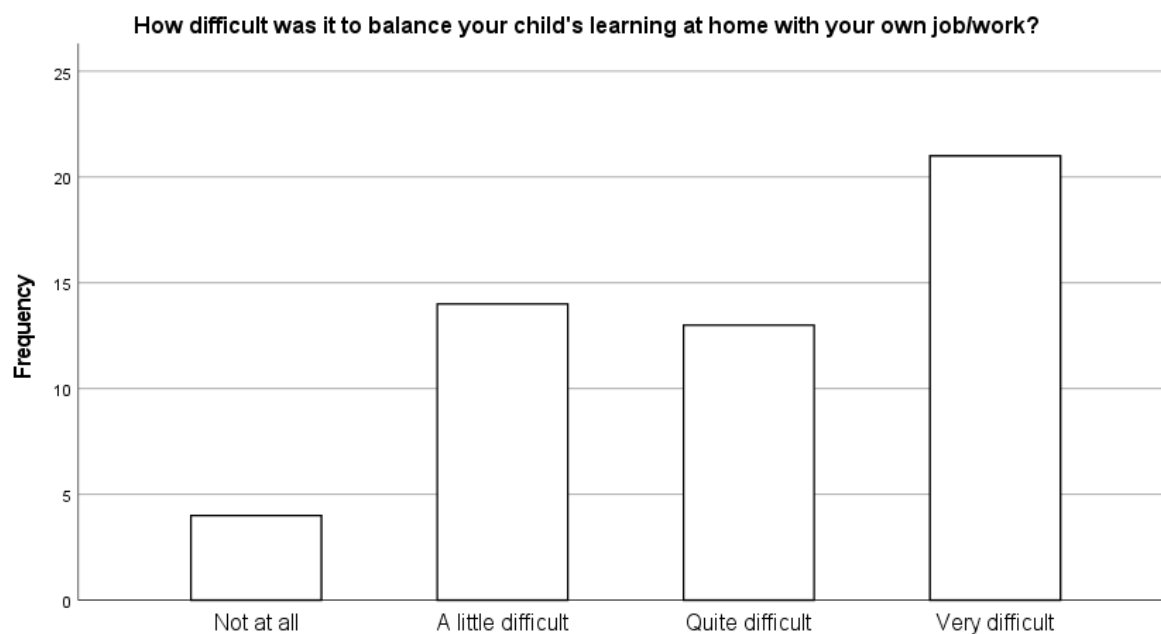

**Figure S4.** Difficulty in balancing parent (employment) and child learning needs.

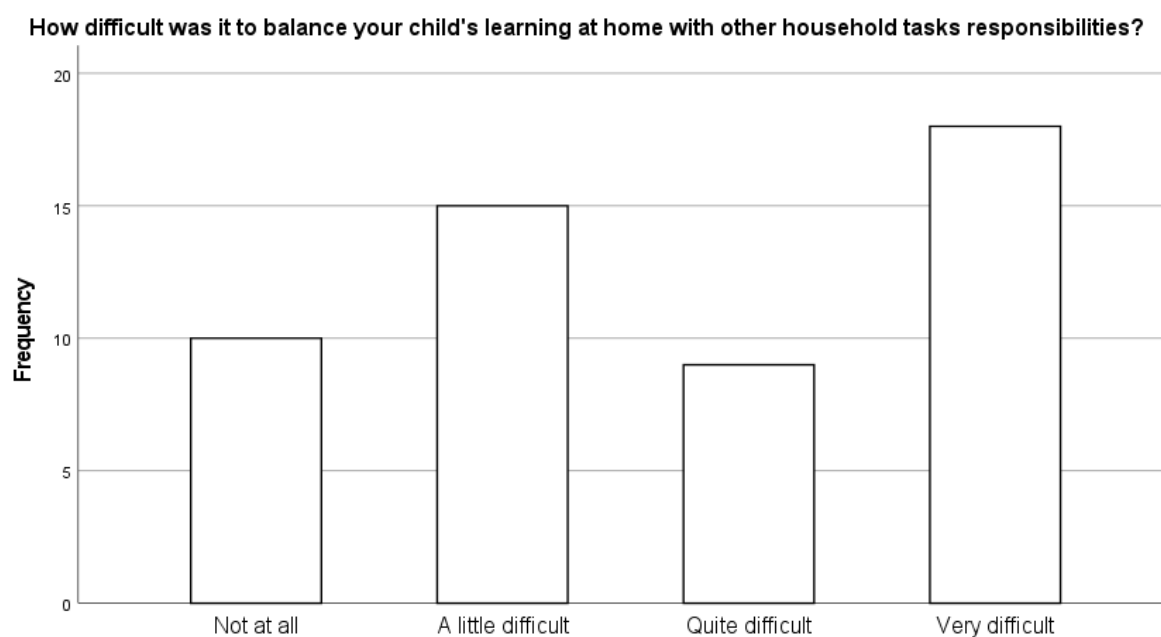

**Figure S5.** Difficulty in balancing parent (household demands) and child learning needs.

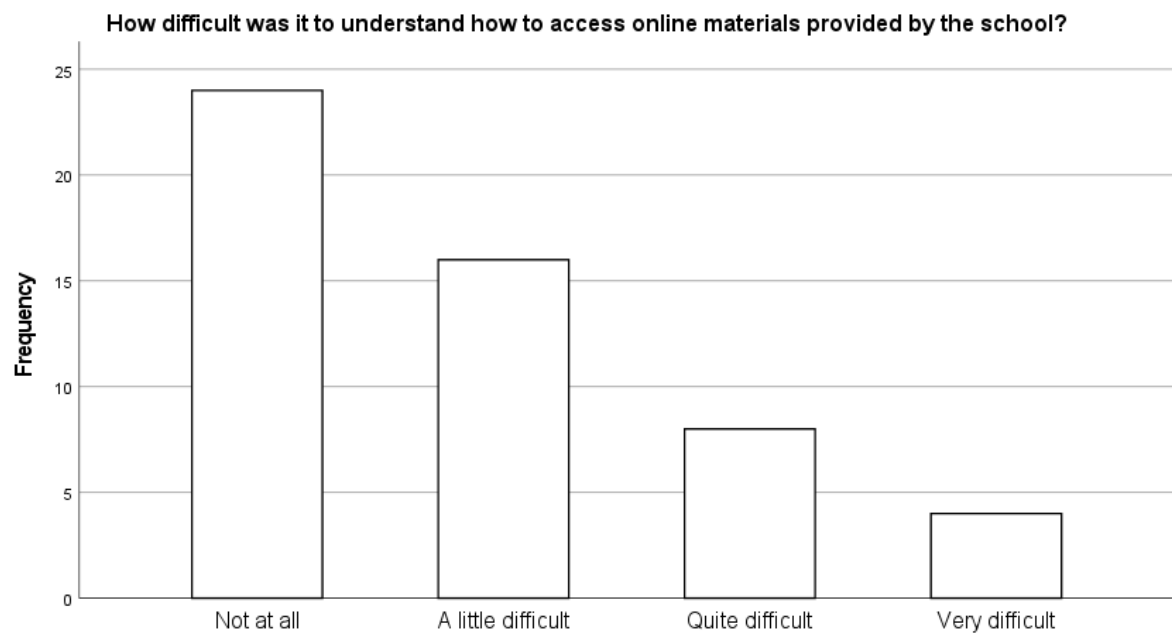

**Figure S6.** Difficulty in accessing online materials.

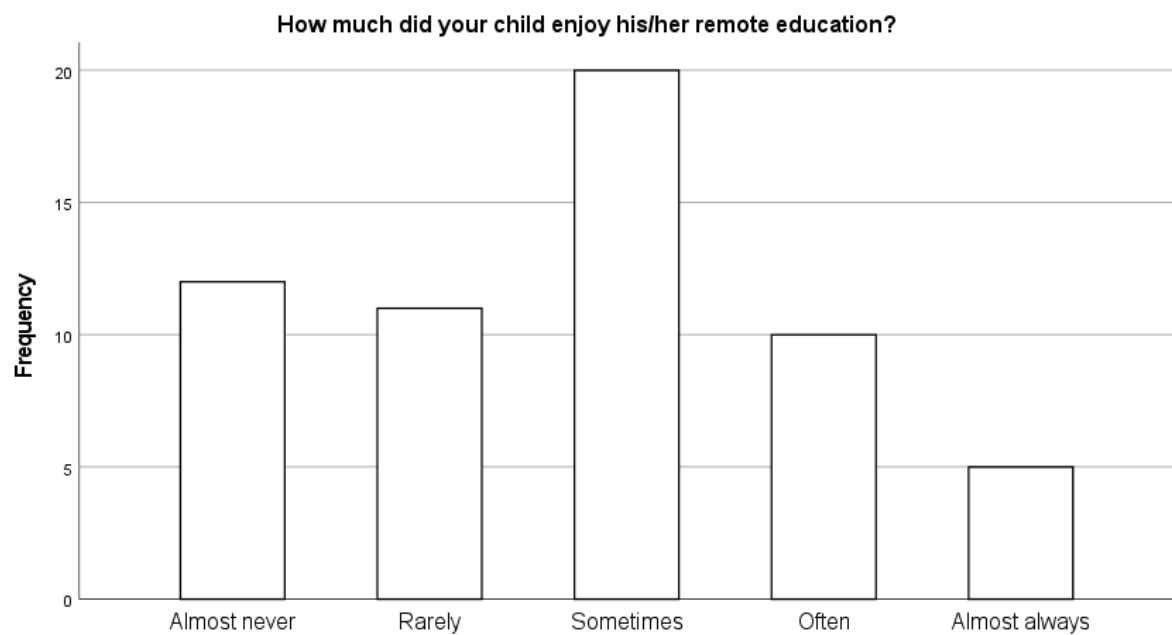

**Figure S7.** Level of enjoyment during online learning.

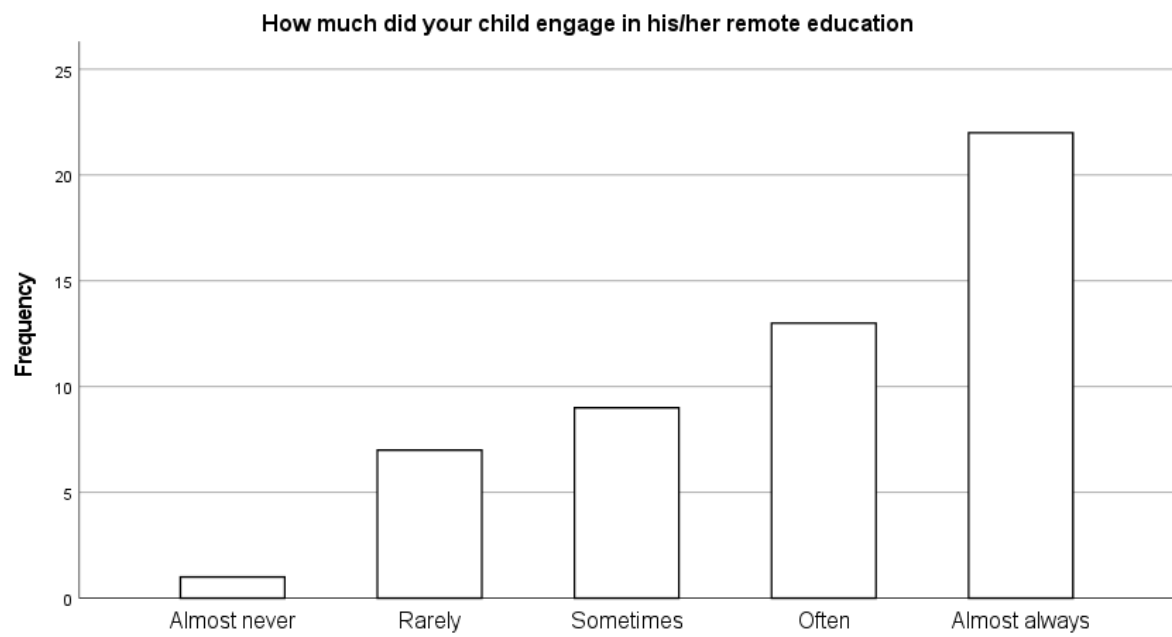

**Figure S8.** Level of engagement during online learning.
